# Supplementary material
Source: ML conference proceedings conference paper supplement (https://aclanthology.org/D18-1499)

# PO Adapted

Perplexity

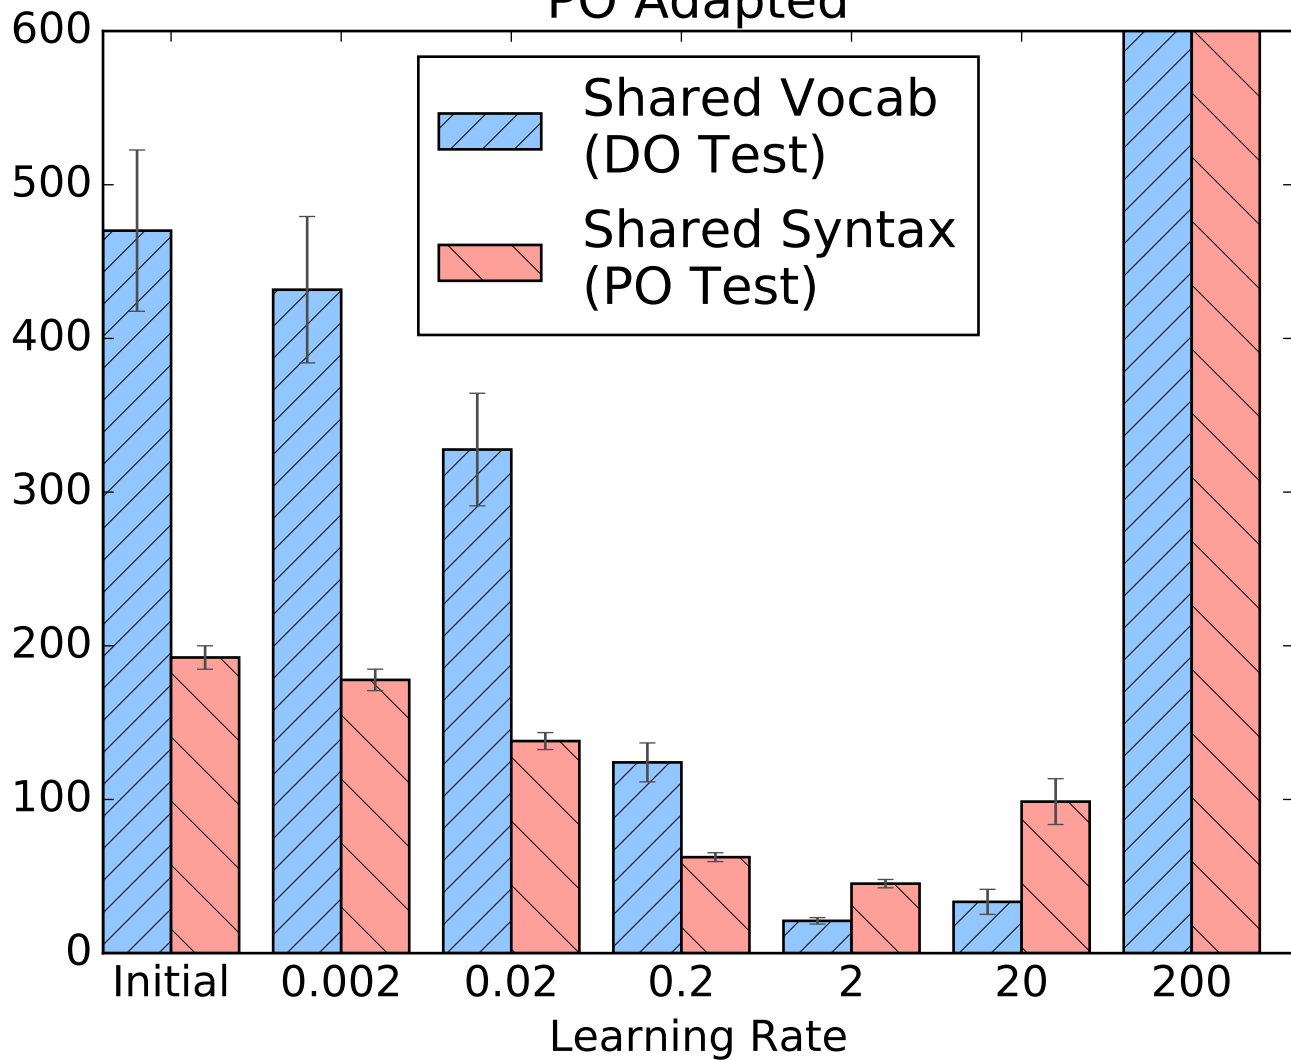

Supplement: Attachment [file D18-1499.Attachment.zip]
